# Supplementary material for: The effects of exercise on FGF21 in adults: a systematic review and meta-analysis
Source: PeerJ. 2024 Jun 25;12:e17615. doi: 10.7717/peerj.17615 (PMC11212618; doi:10.7717/peerj.17615)
Supplement: Supplemental Information 1 [file peerj-12-17615-s001.xlsx]

## Sheet: Sheet1
The value of FGF21 level
	Experimental group			Control group
	mean1	sd1	n1	mean2	sd2	n2
Banitalebi	204.67	111.3	14	235.96	69.74	14
	229.63	94.9	14	235.96	69.74	14
Chang	176.3	107.4	14	219.7	123.9	15
Haghighi	371.7	66.49	10	300.1	24.2	10
	380.9	49.08	10	300.1	24.2	10
Keihanian	250.1	6.7	11	128.2	1.9	11
	184	4.6	12	128.2	1.9	11
Kong	0.5	0.4	10	0.6	0.6	8
Motahari Rad	441.7	110	15	510.9	106.1	13
	449	98.8	15	510.9	106.1	13
Pérez-López	146.09	56.96	10	205.2	64.35	12
	196.52	80	13	205.2	64.35	12
Saeidi	281.6	5.5	12	252.7	5.5	12
Shabkhiz	253.24	116.1	10	285.05	100.19	12
	324.07	107.7	10	403.22	175.41	12
Stine	240.06	354.3	12	320.6	354.3	8
Takahashi	142.9	105.9	23	184.6	113.3	27
Taniguchi	218.5	65.1	17	255.9	88.5	15
